# Supplementary material for: Graphene-Oxide-Coated CoP2@C Anode Enables High Capacity of Lithium-Ion Batteries
Source: MDPI journal article supplement (doi:10.3390/electrochem4040031), 2023-10-26
Supplement: s1 [file s1]

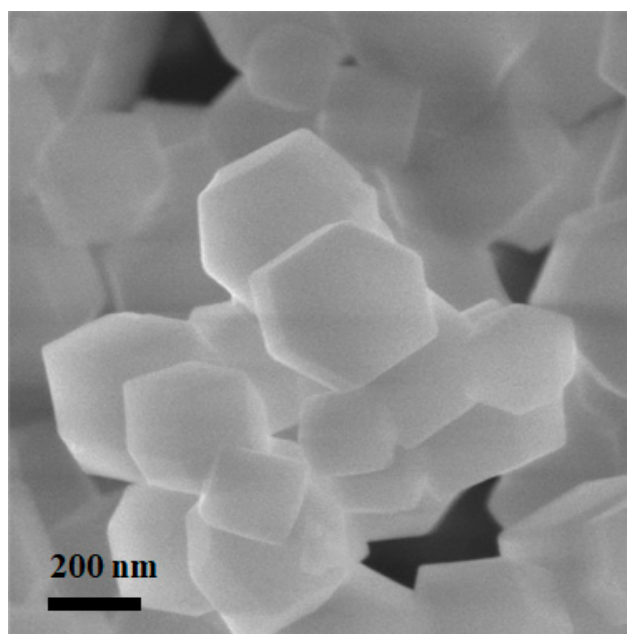

Figure S1. (A, B) SEM images of ZIF-67.

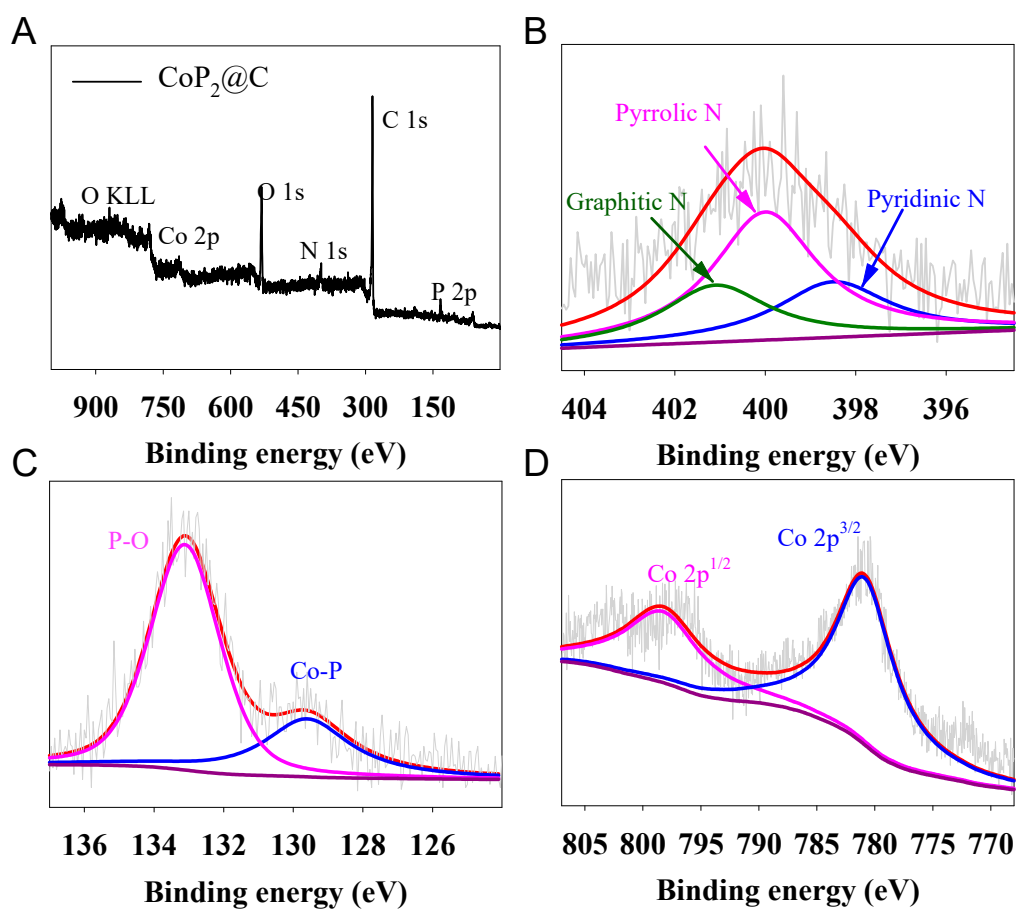

Figure S2. (A) Full XPS of CoP<sub>2</sub>@C, high-resolution XPS of (B) N 1s, (C) P 2p, (D) Co of CoP<sub>2</sub>@C.

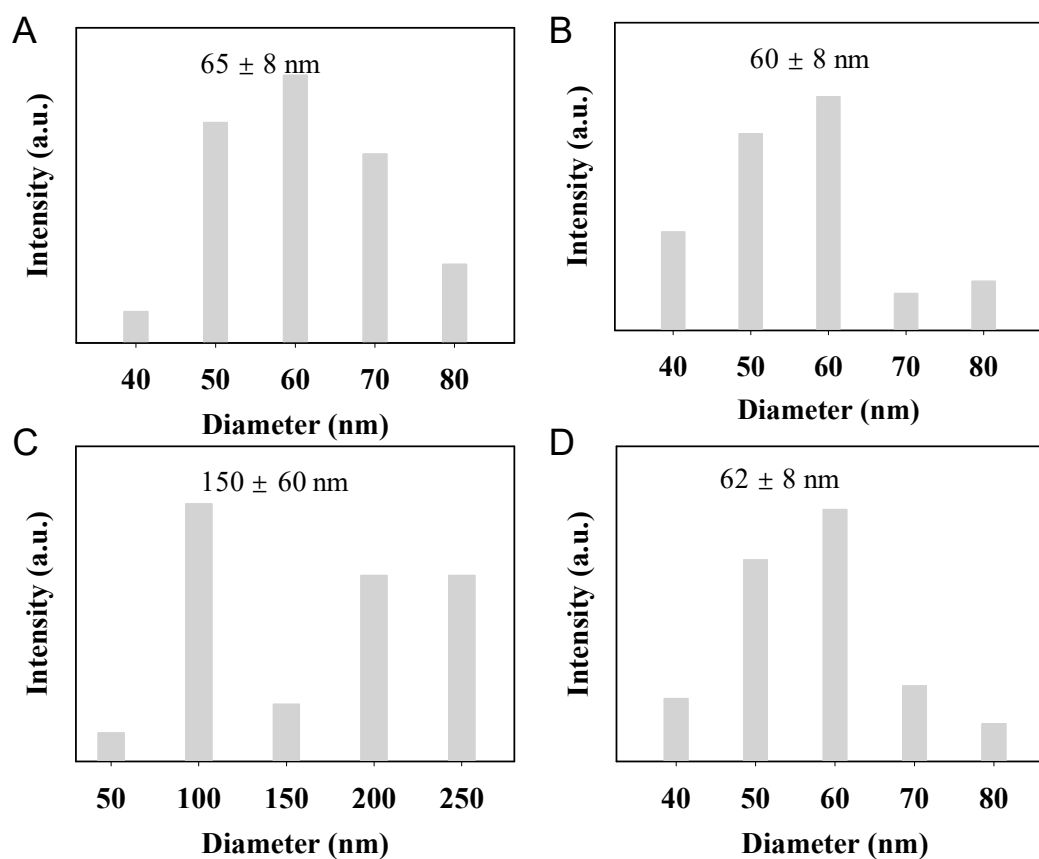

Figure S3. Size distribution histograms of A) CoP<sub>2</sub>@C, B) CoP<sub>2</sub>@C@CO with fresh material; C) CoP<sub>2</sub>@C and D) CoP<sub>2</sub>@C@GO after 200 cycles at 1 A g<sup>-1</sup>, respectively.

Table. S1 Electrochemistry performance of different anode materials for LIBs.

| Materials                              | electrode | Initial capacity (mA h g <sup>-1</sup> ) | capacity(mA h g <sup>-1</sup> )/ cycle number | Ref.      |
|----------------------------------------|-----------|------------------------------------------|-----------------------------------------------|-----------|
| CoP <sub>2</sub> @C@GO                 | Anode     | 1450.0                                   | 452/ 200                                      | This work |
| Turbostratic carbon-coated Graphite    | Anode     | 340.0                                    | 295/300                                       | [1]       |
| NOPTC@ Graphite                        | Anode     | 350.0                                    | 400/450                                       | [2]       |
| TiO <sub>2-x</sub> -decorated graphite | Anode     | 320.0                                    | 240/100                                       | [3]       |
| LTO-SPS                                | Anode     | 169.2                                    | 118/100                                       | [4]       |
| LTO-0.3Br-N-90                         | Anode     | 175.0                                    | 105/100                                       | [5]       |
| FePNC                                  | Anode     | 506.0                                    | 274/200                                       | [6]       |
| C-FeP                                  | Anode     | 551.3                                    | 183.9/200                                     | [7]       |
| rGO@CoP@CeFeP                          | Anode     | 367.6                                    | 285/200                                       | [7]       |
| CoP@C-rGO-NF                           | Anode     | 1163.5                                   | 473.1/100                                     | [8]       |

1. Cai, W.; Yan, C.; Yao, Y.-X.; Xu, L.; Xu, R.; Jiang, L.-L.; Huang, J.-Q.; Zhang, Q. Rapid Lithium Diffusion in Order@Disorder Pathways for Fast-Charging Graphite Anodes. *Small Structures* **2020**, *1*, 2000010, doi:<https://doi.org/10.1002/sstr.202000010>.
2. Zhang, X.-H.; Jiang, R.; Fan, C.-Y.; Xie, D.; Li, B.; Zhang, J.-P.; Wu, X.-L. Engineering All-Purpose Amorphous Carbon Nanotubes with High N/O-Co-Doping Content to Bridge the Alkali-Ion Batteries and Li Metal Batteries. *Small* **2021**, *17*, 2006566, doi:<https://doi.org/10.1002/sml.202006566>.
3. Rhee, D.Y.; Kim, J.; Moon, J.; Park, M.-S. Off-stoichiometric TiO<sub>2-x</sub>-decorated graphite anode for high-power lithium-ion batteries. *Journal of Alloys and Compounds* **2020**, *843*, 156042, doi:<https://doi.org/10.1016/j.jallcom.2020.156042>.
4. Li, J.; Zhang, T.; Han, C.; Li, H.; Shi, R.; Tong, J.; Li, B. Crystallized lithium titanate nanosheets prepared via spark plasma sintering for ultra-high rate lithium ion batteries. *J. Mater. Chem. A* **2019**, *7*, 455-460, doi:10.1039/C8TA10680K.
5. Wang, J.; Yang, Z.; Li, W.; Zhong, X.; Gu, L.; Yu, Y. Nitridation Br-doped Li<sub>4</sub>Ti<sub>5</sub>O<sub>12</sub> anode for high rate lithium ion batteries. *Journal of Power Sources* **2014**, *266*, 323-331, doi:<https://doi.org/10.1016/j.jpowsour.2014.05.025>.
6. Von Lim, Y.; Huang, S.; Zhang, Y.; Kong, D.; Wang, Y.; Guo, L.; Zhang, J.; Shi, Y.; Chen, T.P.; Ang, L.K.; et al. Bifunctional porous iron phosphide/carbon nanostructure enabled high-performance sodium-ion battery and hydrogen evolution reaction. *Energy Storage Materials* **2018**, *15*, 98-107, doi:<https://doi.org/10.1016/j.ensm.2018.03.009>.
7. Li, Z.; Zhang, L.; Ge, X.; Li, C.; Dong, S.; Wang, C.; Yin, L. Core-shell structured CoP/FeP porous microcubes interconnected by reduced graphene oxide as high performance anodes for sodium ion batteries. *Nano Energy* **2017**, *32*, 494-502, doi:<https://doi.org/10.1016/j.nanoen.2017.01.009>.
8. Ge, X.; Li, Z.; Yin, L. Metal-organic frameworks derived porous core/shellCoP@C

polyhedrons anchored on 3D reduced graphene oxide networks as anode for sodium-ion battery. *Nano Energy* **2017**, 32, 117-124, doi:<https://doi.org/10.1016/j.nanoen.2016.11.055>.
